# Supplementary material for: Pulsed laser synthesis of highly active Ag–Rh and Ag–Pt antenna–reactor-type plasmonic catalysts
Source: publisher site journal article supplement (doi:10.3762/bjnano.10.192), 2019-09-26
Supplement: Additional file 1 [file 2190-4286-10-192-S1.pdf]

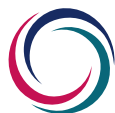

## Supporting Information

for

### **Pulsed laser synthesis of highly active Ag–Rh and Ag–Pt antenna–reactor-type plasmonic catalysts**

Kenneth A. Kane and Massimo F. Bertino

*Beilstein J. Nanotechnol.* **2019**, *10*, 1958–1963. doi:10.3762/bjnano.10.192

## Additional experimental data

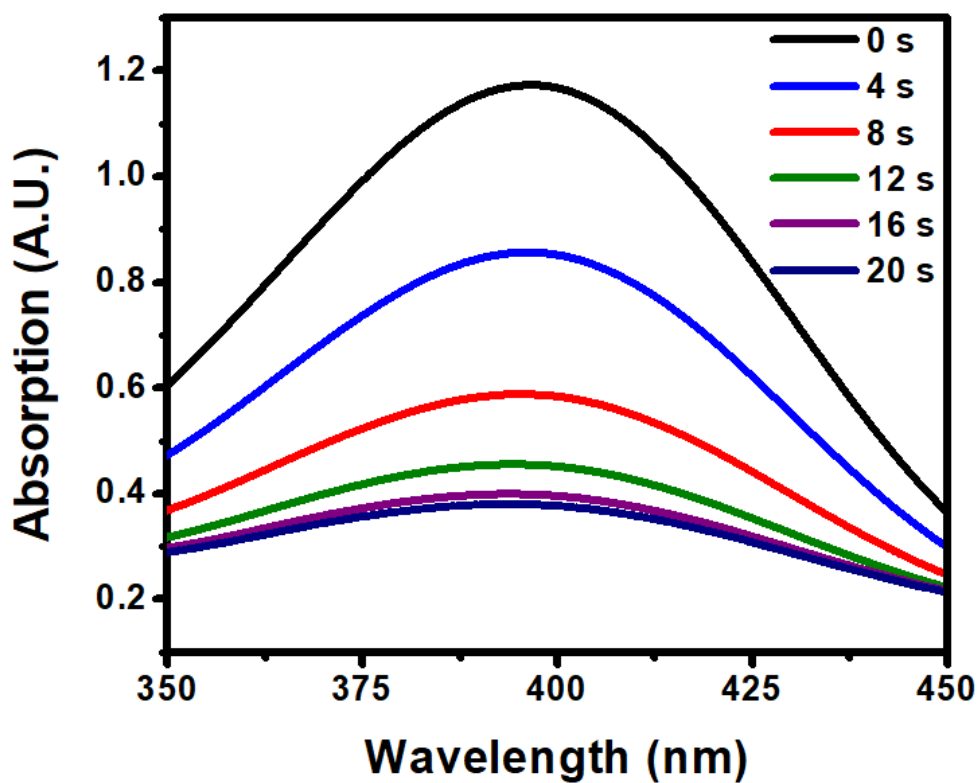

**Figure S1:** Time-dependent absorption spectrum of a typical 4-nitrophenol reduction over colloidal Ag–Pt heterostructures. The intensity of the absorption at 400 nm is proportional to the concentration of the 4-nitrophenolate ion in solution, which forms immediately after the introduction of  $\text{NaBH}_4$ .

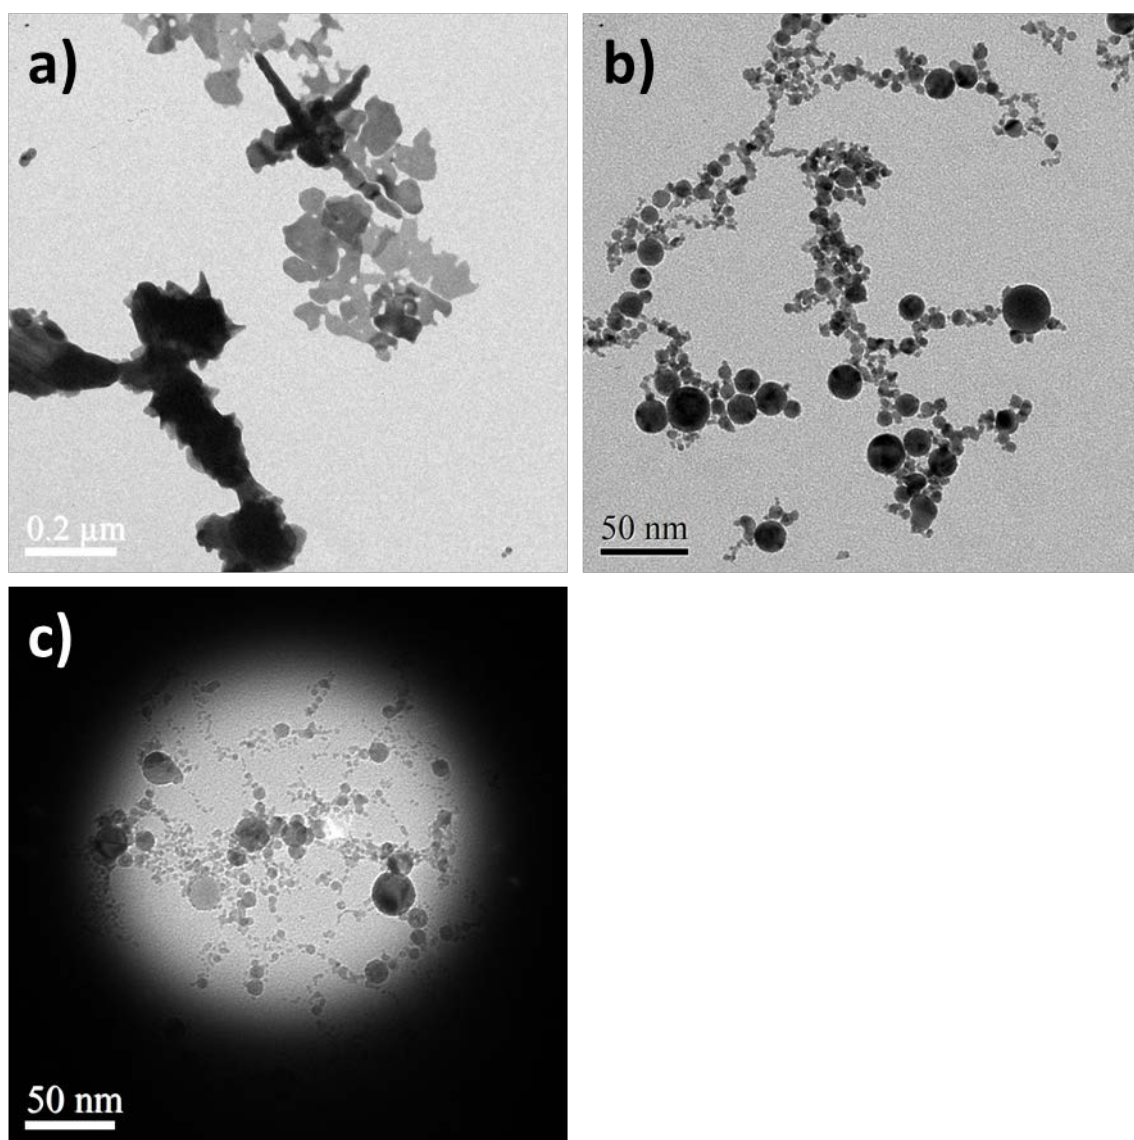

**Figure S2:** a) Silver nanostructures, b) platinum nanoparticles, and c) rhodium nanoparticles produced by pulse laser ablation.

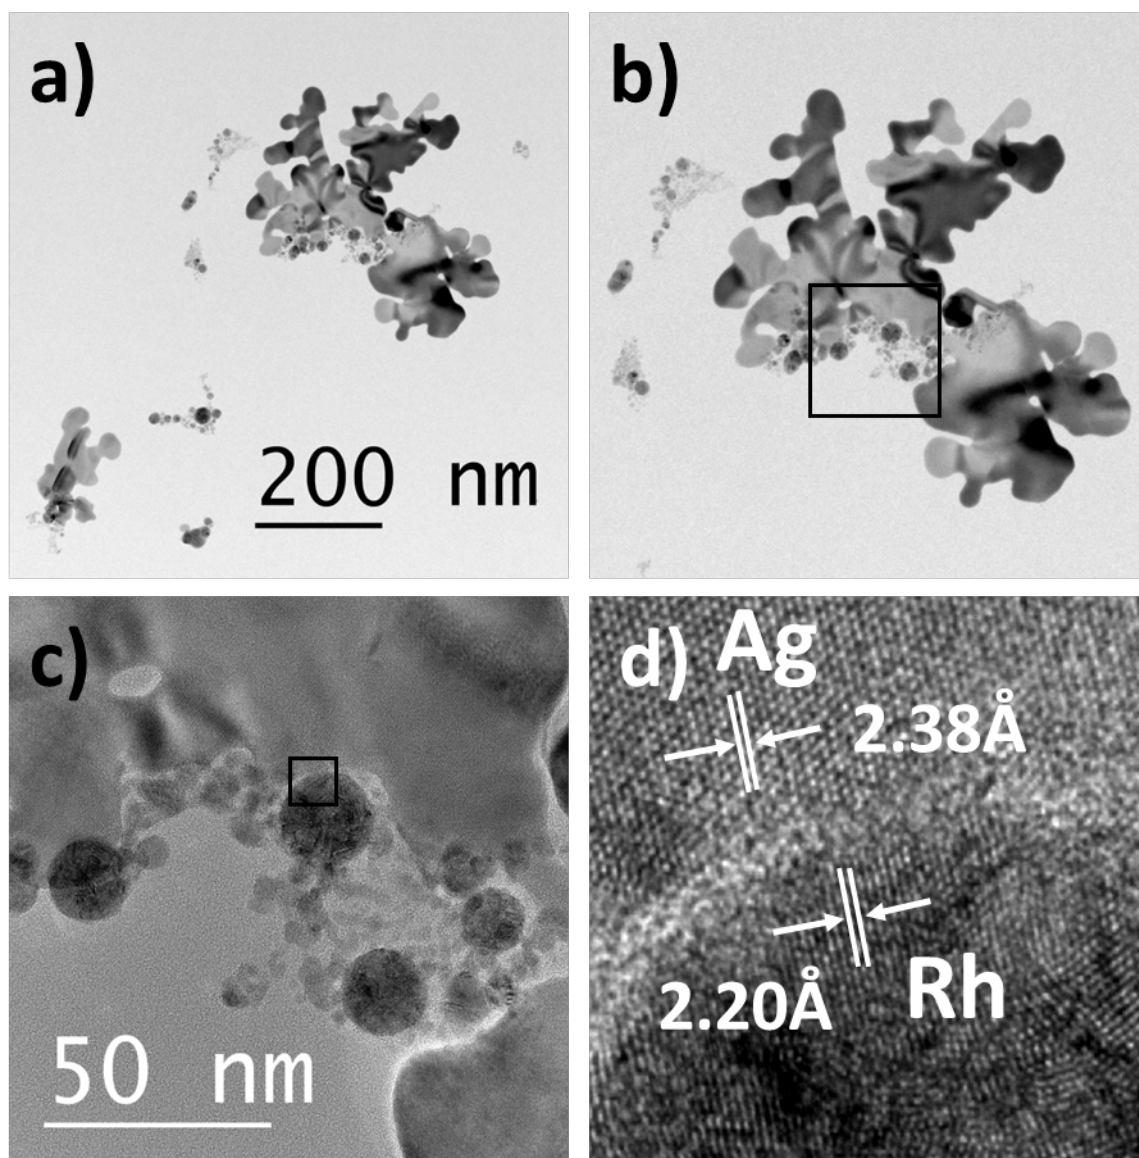

**Figure S3:** a) Bright-field image of mixed Ag–Rh heterostructures. b) Close up of (a) showing Rh NP grouping adsorbed onto Ag nanostructure concavity. c) HR-TEM image of highlighted area from (b) . d) Close-up of the highlighted area in (c) showing lattice spacings of Ag and Rh.

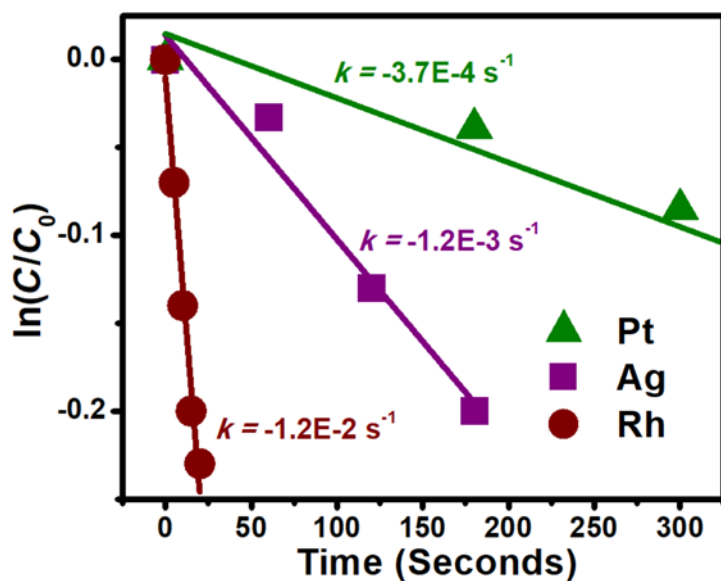

**Figure S4:** Experimentally observed rate constants in the form of  $\ln(C/C_0) = -kt$ .  $C_0$  is taken as

$\text{Abs}_{400\text{nm}}$  prior to the reducing agent spike.  $t = 0$  s is taken as the time the spike occurs.
